# Supplementary material for: Hydrothermal synthesis of NiFe2O4nanoparticles as an efficient electrocatalyst for the electrochemical detection of bisphenol A
Source: Royal Society of Chemistry journal article supplement (doi:10.1039/d0nj00608d), 2020-01-01
Supplement: d0nj00608d1.pdf [file d0nj00608d1.pdf]

1 *Supplementary Information*

2

3 **Hydrothermal synthesis of NiFe<sub>2</sub>O<sub>4</sub> nanoparticles as an efficient electro catalyst for the**  
4 **electrochemical detection of bisphenol-A**

5

6 *Kesavan Ganesh<sup>a</sup>, Nataraj Nandini<sup>a</sup>, Shen-Ming Chen<sup>a\*</sup>, Li-Heng Lin<sup>a</sup>*

7 *<sup>a</sup>Electroanalysis and Bioelectrochemistry Lab, Department of Chemical Engineering and Biotechnology,*  
8 *National Taipei University of Technology, Taipei 106, Taiwan, ROC.*

9 **Corresponding Authors**

10 E-mail: *smchen78@ms15.hinet.net* (S-M Chen),

11 Fax: +886 2270 25238; Tel: +886 2270 17147.

12

13

14

15

16

17

18

19

20

21

22

23

24

25

26

27

28

29

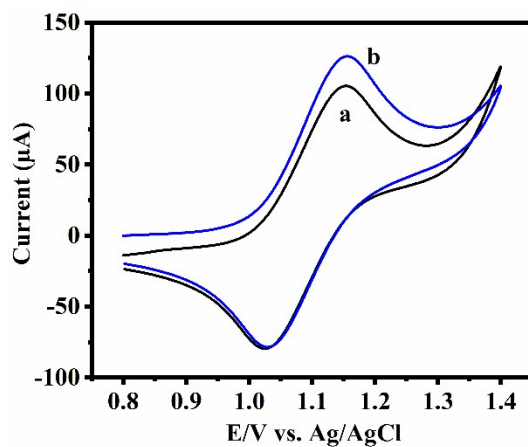

30

**Fig. S1:** CV studies of the bare SPCE (a), and NFO/SPCE (b) in the 5 mM  $[\text{Ru}(\text{bpy})_3]^{2+}/0.1 \text{ M}$  KCl) with scan rate of  $50 \text{ mVs}^{-1}$ .

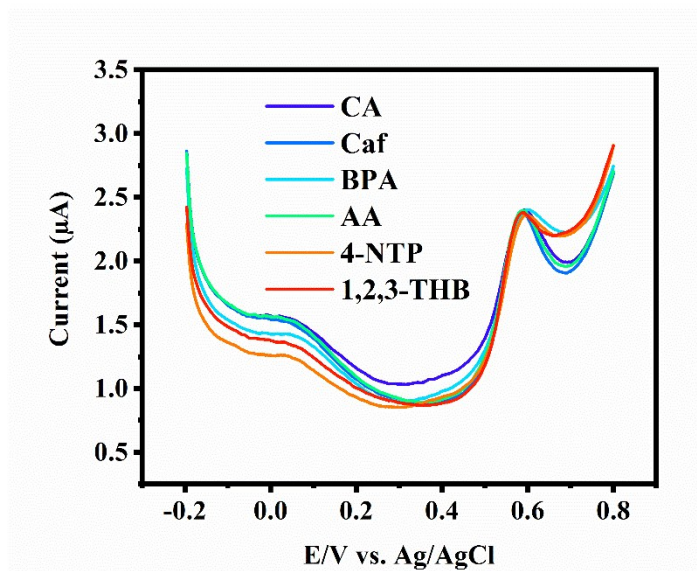

**Fig. S2:** DPV response peaks of different concentration of phenolic and rich polyphenolic interfering compounds on NFO/SPCE at  $50 \text{ mVs}^{-1}$  in PBS (7.0)

Table S1: Previously published report in comparison with proposed sensor

| Electrode          | LOD (nM) | Linear range (μM) | Method | Reference |
|--------------------|----------|-------------------|--------|-----------|
| GNPs–MWCNTs–CS/GCE | 0.05     | 0.1–100           | DPV    | 1         |

|                                         |     |           |         |                 |
|-----------------------------------------|-----|-----------|---------|-----------------|
| thionine–CB–SPE                         | 200 | 0.5–50    | i-t     | 2               |
| Au-Cu@BSA-GNRs/GCE                      | 4.0 | 2.0– 0    | SWASV * | 3               |
| MWCNT–PDDA–AuPd                         | 60  | 0.18–18   | DPV     | 4               |
| MB–incubated<br>SH– $\beta$ –CD/NPGL/GE | 60  | 0.3–100   | SWV     | 5               |
| AuNPs /CBNPs/SPCE                       | 8.8 | 0.07–10   | DPV     | 6               |
| NiFe <sub>2</sub> O <sub>4</sub> /SPCE  | 6.0 | 0.02–12.5 | DPV     | Present<br>work |

GNPs–MWCNTs–CS/GCE: Graphene nanoplatelets (GNPs), multiwalled carbon nanotube (MWCNTs) and chitosan (CS) modified glassy carbon electrode; thionine–CB–SPE: laccase–thionine–carbon black–modified screen–printed electrode; Au–Cu@BSA–GNRs/GCE: Au–Cu bimetallic nanoclusters–bovine serum albumin–graphene nanoribbons modified glassy carbon electrode; MWCNT–PDDA–AuPd: Poly (diallyldimethylammonium chloride)–AuPd (gold palladium) bimetallic incorporated carboxylic multi–walled carbon nanotubes; MB–incubated SH– $\beta$ –CD/NPGL/GE: gold leaf (NPGL) with thiolated beta–cyclodextrin (SH– $\beta$ –CD); AuNPs /CBNPs/SPCE: Screen printed carbon electrode modified with molecularly imprinted polymer (US–MagMIP) and carbon black nanoparticles (CBNPs)

31

Table S2: Determination of BPA in tea samples

| Sample           | BPA concentration ( $\mu$ M) |       | Recovery (%) | RSD (%) |
|------------------|------------------------------|-------|--------------|---------|
|                  | Added                        | Found |              |         |
| <b>Black tea</b> | 1.5                          | 1.44  | 96.0         | 1.9     |
|                  | 2.5                          | 2.48  | 99.2         | 1.3     |
|                  | 4.5                          | 4.34  | 97.58        | 1.8     |
|                  | 6                            | 5.79  | 96.5         | 2.5     |
| <b>Green tea</b> | 2                            | 1.94  | 97           | 1.4     |
|                  | 4                            | 3.88  | 96.75        | 1.3     |
|                  | 6.5                          | 6.32  | 97.23        | 2.3     |

32

33 **References**

34

- 35 1 J. Zou, M. M. Yuan, Z. N. Huang, X. Q. Chen, X. Y. Jiang, F. P. Jiao, N. Zhou, Z. Zhou  
36 and J. G. Yu, *Mater. Sci. Eng. C*, 2019, **103**, 109848.
- 37 2 M. Cammarota, M. Lepore, M. Portaccio, D. Di Tuoro, F. Arduini, D. Moscone and D. G.  
38 Mita, *Electrochim. Acta*, 2013, **109**, 340–347.
- 39 3 E. Mahmoudi, A. Hajian, M. Rezaei, A. Afkhami, A. Amine and H. Bagheri, *Microchem.*  
40 *J.*, 2019, **145**, 242–251.
- 41 4 F. Mo, J. Xie, T. Wu, M. Liu, Y. Zhang and S. Yao, *Food Chem.*, 2019, **292**, 253–259.
- 42 5 R. Zhang, Y. Zhang, X. Deng, S. Sun and Y. Li, *Electrochim. Acta*, 2018, **271**, 417–424.
- 43 6 N. Ben, A. Ait, C. Dridi and A. Amine, *Sensors Actuators B. Chem.*, 2018, **276**, 304–312.

44
